# Supplementary material for: Synthesis of CoFe 2 O 4 @SiO 2 –NH 2 and its application in adsorption of trace lead
Source: Royal Society of Chemistry journal article supplement (doi:10.1039/d3ra06091h), 2024-01-01
Supplement: d3ra06091h1.pdf [file d3ra06091h1.pdf]

# 1 Synthesis of $\text{CoFe}_2\text{O}_4@\text{SiO}_2\text{-NH}_2$ and its application in adsorption of 2 trace lead

3 Yanxia Zeng<sup>a, b, c, d</sup>, Jiliang Xie<sup>a, b, c</sup>, Xin Xiao<sup>a, b, c, \*</sup>, Li Chen<sup>b, c, \*</sup>, Xiashi Zhu<sup>d, \*</sup>

4 a. Jiangsu Key Laboratory of Marine Bioresources and Environment, Jiangsu Ocean University,  
5 59 Cangwu Road, Haizhou, Lianyungang 222005, China.

6 b. Co-Innovation Center of Jiangsu Marine Bio-industry Technology, Jiangsu Ocean University,  
7 59 Cangwu Road, Haizhou, Lianyungang 222005, China.

8 c. Jiangsu Institute of Marine Resources Development, 59 Cangwu Road, Haizhou, Lianyungang  
9 222005, China.

10 d. School of Chemistry and Chemical Engineering, Yangzhou University, Yangzhou City, Jiangsu  
11 Province 225009, China

12 \* Corresponding author. E-mail: xiaoxin@njust.edu.cn; chenli@jou.edu.cn

13

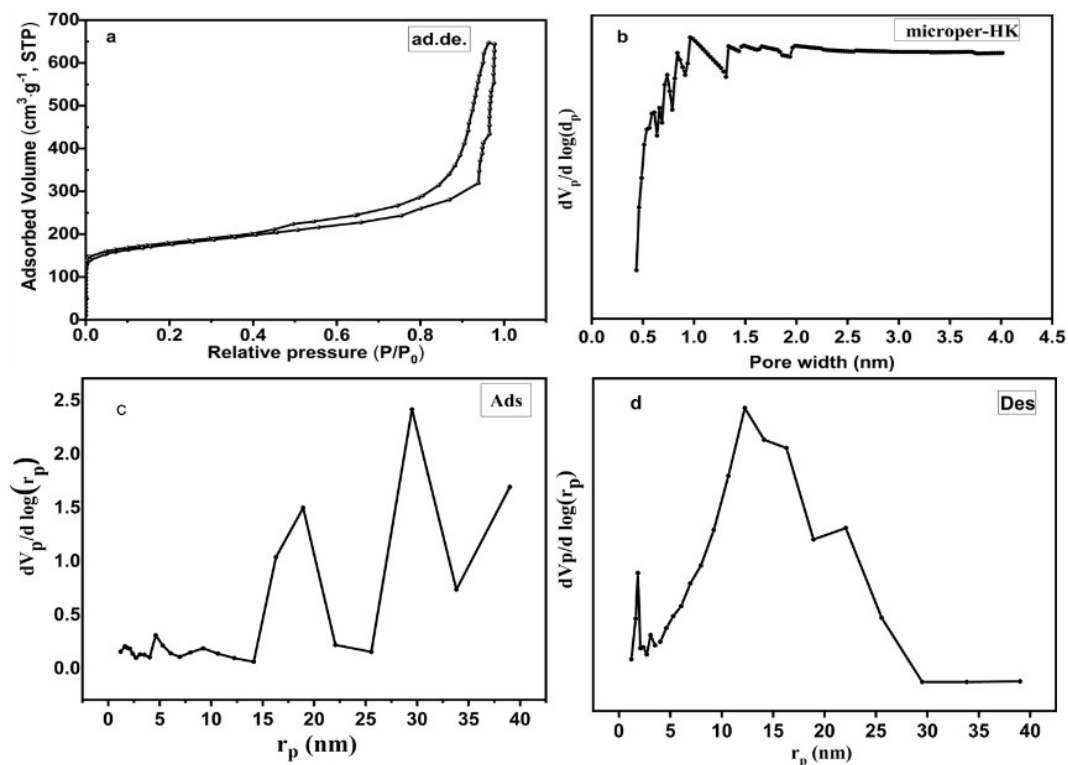

14

Fig. S1 Surface area analysis of  $\text{CoFe}_2\text{O}_4@\text{SiO}_2\text{-NH}_2$ 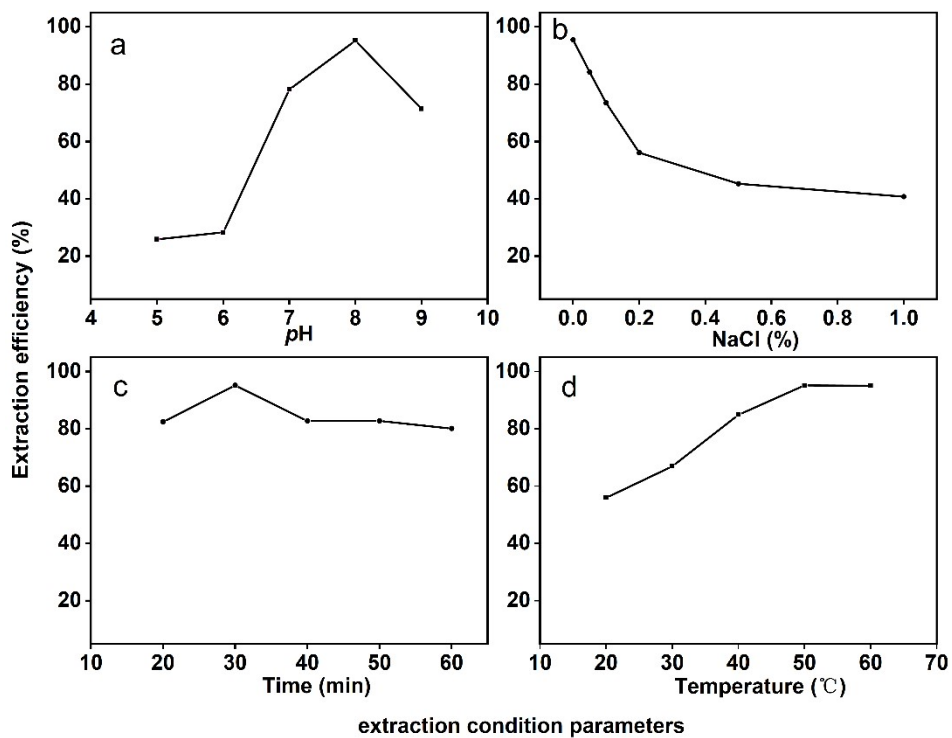

16

17 Fig. S2 Effect of extraction condition on extraction efficiency. Conditions:  $C_0 = 4.0 \mu\text{g}\cdot\text{mL}^{-1}$ ;

18

$$V_0 = 200 \text{ mL}; m_{\text{extractant}} = 10 \text{ mg}$$

19

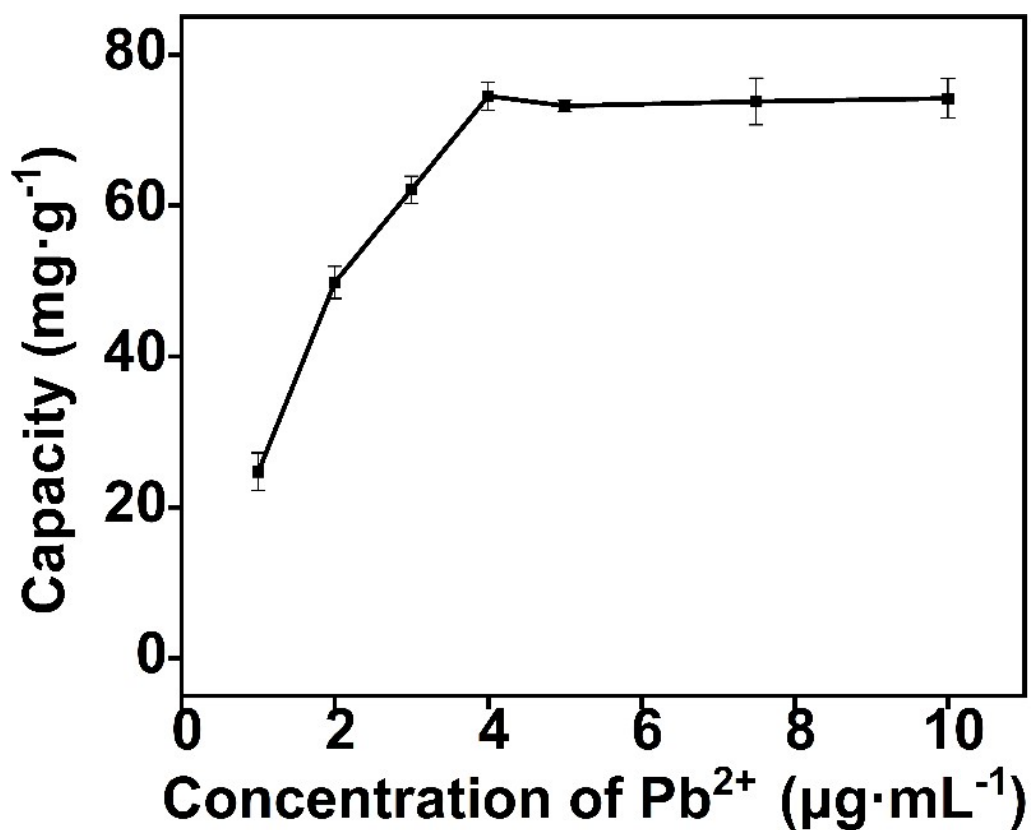

20

21

Fig. S3 Extraction capacity of CoFe<sub>2</sub>O<sub>4</sub>@SiO<sub>2</sub>-NH<sub>2</sub> of Pb<sup>2+</sup>

22

(Conditions: m(MSA)=10 mg; V<sub>0</sub>=200.00mL; pH = 8.0; t = 30 min; T = 50°C)

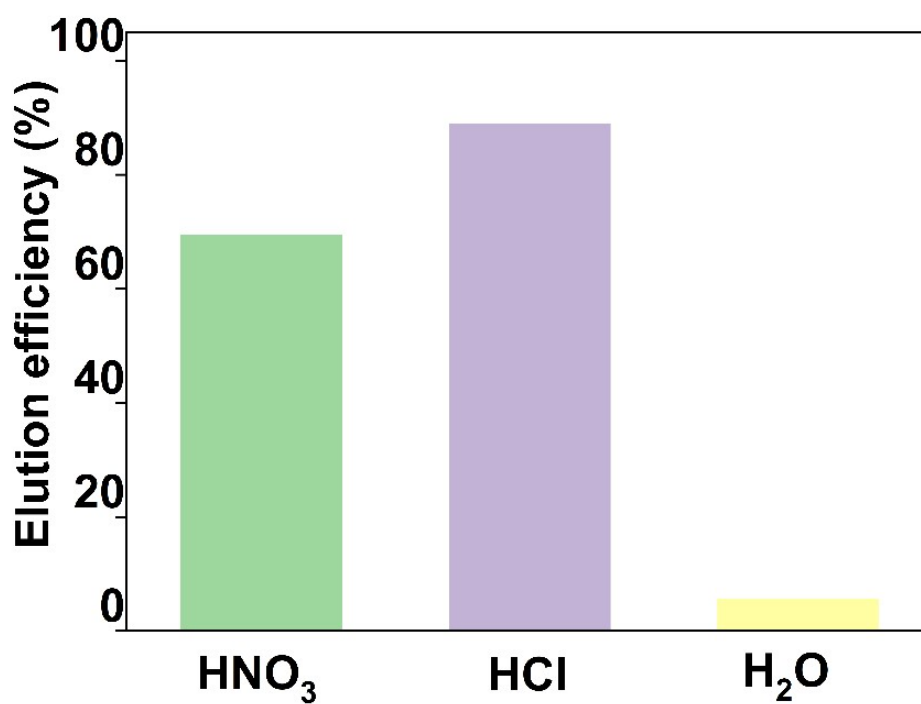

23

24

Fig. S4 Effect of eluent on extraction efficiency

25

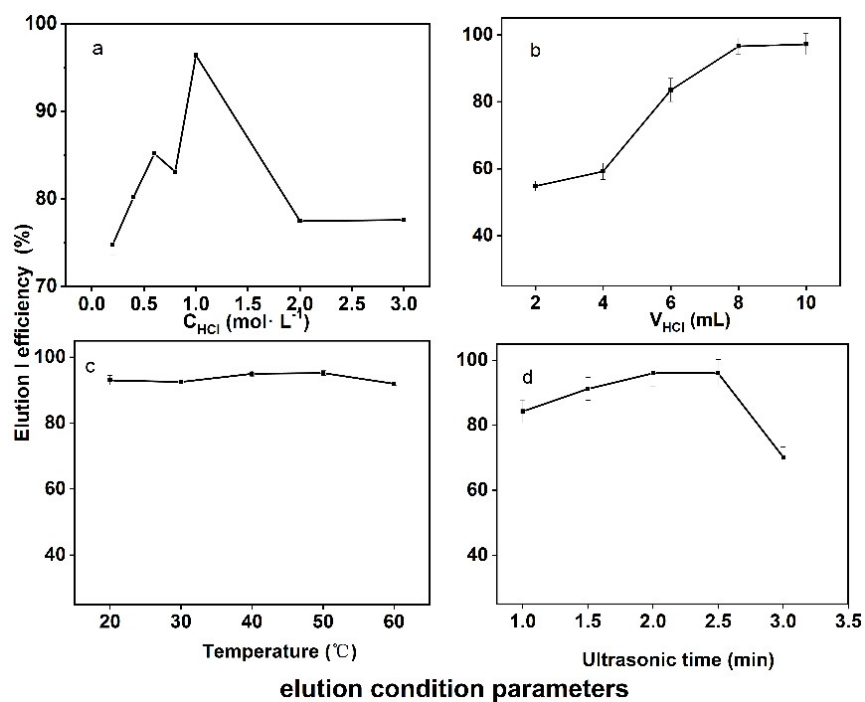

26

27

Fig. S5 Effect of elution condition parameters on elution efficiency ( $C_{\text{HCl}}$ (a),

28

$V_{\text{HCl}}$ (b), Temperature(c), Ultrasonic Time(d))

29

30

Table S1 Recovery test of determination of lead (II) content in water sample (n = 3)

| Samples                                       | Added<br>( $\mu\text{g}\cdot\text{L}^{-1}$ ) | Found<br>( $\mu\text{g}\cdot\text{L}^{-1}$ ) | Recovery<br>(%) |
|-----------------------------------------------|----------------------------------------------|----------------------------------------------|-----------------|
| Standard water sample <sup>1</sup> (GBW08608) | 0                                            | 47.8                                         | 98.6            |
|                                               | 2.00                                         | 49.2                                         | 97.4            |
|                                               | 10.0                                         | 56.8                                         | 97.1            |
|                                               | 50.0                                         | 93.2                                         | 94.6            |
| Actual water sample (on campus)               | 0                                            | 0.68                                         | /               |
|                                               | 1.00                                         | 1.78                                         | 106             |
|                                               | 2.00                                         | 2.78                                         | 104             |
|                                               | 4.00                                         | 4.57                                         | 97.6            |

31

<sup>1</sup>Standard value  $48.5 \mu\text{g}\cdot\text{L}^{-1}$

32

33

34

35

36

37

38

40 Table S2 Determination of lead content in water samples in Lianyungang City ( $\mu\text{g}\cdot\text{L}^{-1}$ ,  $n=20$ )

| Test results                             | Standar         | Locations |      |      |      |     |     |     |      |
|------------------------------------------|-----------------|-----------|------|------|------|-----|-----|-----|------|
|                                          | d water samples | A         | B    | C    | D    | E   | F   | G   | H    |
| Content/ $\mu\text{g}\cdot\text{L}^{-1}$ | 48.5            | 1.0       | 0.82 | 0.90 | 1.1  | 1.5 | 1.2 | 1.3 | 0.68 |
| RSD/%                                    | 3.2             | 1.5       | 1.8  | 1.7  | 0.50 | 3.2 | 2.8 | 1.6 | 2.8  |
| Lead allowable standard                  | 10              |           |      |      |      |     |     |     |      |

41

42 Table S3 Comparison with other methods for the determination of lead ion

| Method                  | Extractant                                                           | LOD ( $\mu\text{g}\cdot\text{L}^{-1}$ ) | Linear range ( $\mu\text{g}\cdot\text{L}^{-1}$ ) | Ref.             |
|-------------------------|----------------------------------------------------------------------|-----------------------------------------|--------------------------------------------------|------------------|
| MSPE-ICP-MS             | $\text{Fe}_3\text{O}_4\text{-GO@SiO}_2$                              |                                         | 0.0076                                           | 0.05-60 [39]     |
| Electrochemical method  | $\text{Fe}_3\text{O}_4\text{@PDA-DMSA}$                              |                                         | 0.20                                             | 0.5-50 [40]      |
| MSPE-FAAS               | $\text{Fe}_3\text{O}_4\text{@Ag-APT}$                                |                                         | 10                                               | 33-1000 [41]     |
| MSPE-FAAS               | $\text{CoFe}_2\text{O}_4\text{@SiO}_2\text{@PABA-functionalized GO}$ |                                         | 0.0054                                           | 0.013-0.235 [42] |
| Ionic imprinting (IIMB) | $\text{Serratia marcescens-CMC-Fe}_3\text{O}_4$                      |                                         | 0.95                                             | 5~500 [43]       |
| ) -FAAS                 |                                                                      |                                         |                                                  | 3~               |
| MSPE-AAS                | $\text{Fe}_3\text{O}_4\text{-PVP-SiO}_2\text{-P}_4\text{VP}$         |                                         | 0.9                                              | 1000 [44]        |
| MSPE-ICP-OES            | $\text{CoFe}_2\text{O}_4\text{@SiO}_2\text{-NH}_2$                   |                                         | 0.027                                            | 1.0~ This        |

43  
44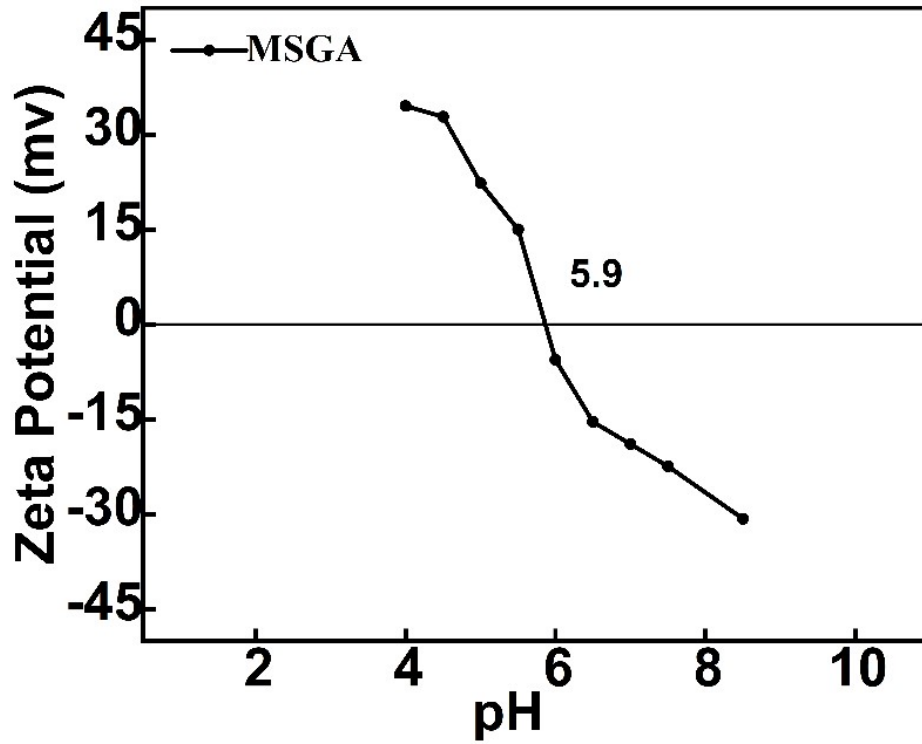45  
46  
47Fig. S6 Zeta potential of  $\text{CoFe}_2\text{O}_4@\text{SiO}_2\text{-NH}_2$ 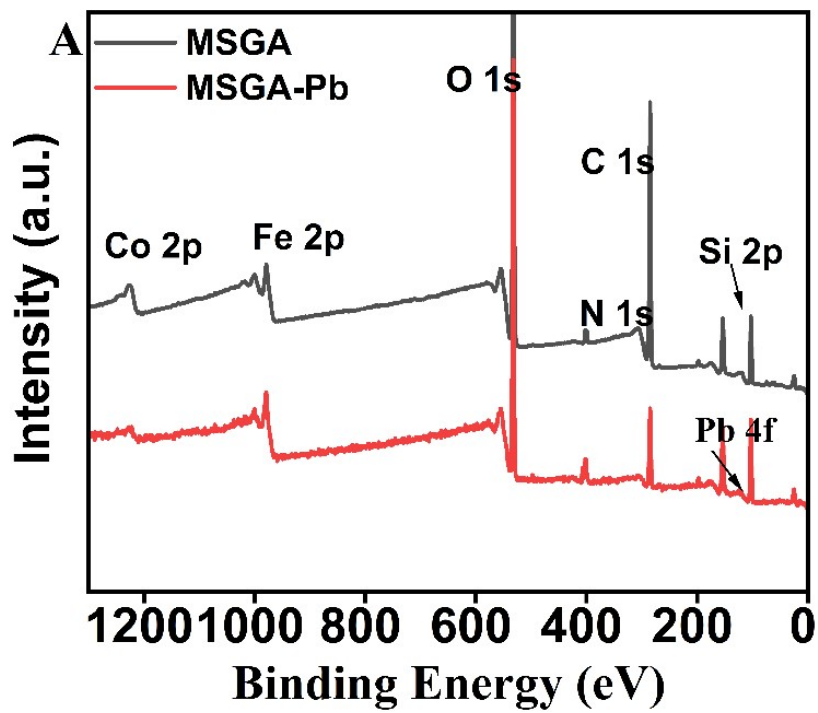

48

49 Fig. S7 XPS full I spectra of CoFe<sub>2</sub>O<sub>4</sub>@SiO<sub>2</sub>-NH<sub>2</sub> of the samples before and after extraction

50

51

52

53

54

Table S4 Kinetic model fitting parameters

| Pseudo-First Order  |                     |        |        | Pseudo-Second Order                               |                                                         |        |
|---------------------|---------------------|--------|--------|---------------------------------------------------|---------------------------------------------------------|--------|
| $Q_{e, \text{exp}}$ | $Q_{e, \text{cal}}$ | $k_1$  | $R^2$  | $q_{e, \text{cal}}/(\text{mg}\cdot\text{g}^{-1})$ | $k_2/(\text{g}\cdot\text{mg}^{-1}\cdot\text{min}^{-1})$ | $R^2$  |
| 74.5                | 0.47                | 0.0083 | 0.5572 | 75.8                                              | 0.0858                                                  | 0.9999 |

55

56

57

Table S5. Langmuir and Freundlich isotherms parameters

| Langmuir                            |                                    |        | Freundlich |       |        |  |
|-------------------------------------|------------------------------------|--------|------------|-------|--------|--|
| $Q_m (\text{mg}\cdot\text{g}^{-1})$ | $K_L(\text{L}\cdot\text{mg}^{-1})$ | $R^2$  | n          | $K_F$ | $R^2$  |  |
| 82.3                                | 0.228                              | 0.9867 | 2.19       | 32.1  | 0.7847 |  |

58
